# Supplementary material for: Proteometabolomic Analysis Reveals Molecular Features Associated with Grain Size and Antioxidant Properties amongst Chickpea (Cicer arietinum L.) Seeds Genotypes
Source: MDPI journal article supplement (doi:10.3390/antiox11101850), 2022-09-20
Supplement: s1 [file s1]

**Table S1.** Proximate composition of Chickpea grains. Number in bold and underlined are highest and lowest data. Different letters or asterisks refer to significant differences.

| <b>Genotype</b> | <b>Protein (%)</b> |                   | <b>Moisture (%)</b> |       | <b>Lipids (%)</b> |       | <b>Crude fiber (%)</b> |                   | <b>Ash (%)</b> |      | <b>Nitrogen free extract (%)</b> |                   |
|-----------------|--------------------|-------------------|---------------------|-------|-------------------|-------|------------------------|-------------------|----------------|------|----------------------------------|-------------------|
|                 | Mean               | SD                | Mean                | SD    | Mean              | SD    | Mean                   | SD                | Mean           | SD   | Mean                             | SD                |
| SmallF1         | 19.57              | 0.14 <sup>b</sup> | 8.71                | 0.14* | 11.01             | 0.53* | 4.06                   | 0.62 <sup>c</sup> | 3.02           | 0.09 | 53.62                            | 0.86 <sup>c</sup> |
| BigF2           | 21.49              | 0.52 <sup>a</sup> | 7.92                | 0.16  | 5.50              | 0.16  | 6.24                   | 0.41 <sup>b</sup> | 3.11           | 0.09 | 55.73                            | 0.88 <sup>b</sup> |
| SmallCo         | 18.50              | 0.26 <sup>b</sup> | 7.70                | 0.13  | 5.40              | 0.36* | 6.26                   | 0.21 <sup>b</sup> | 3.23           | 0.16 | 58.84                            | 0.40 <sup>a</sup> |
| BigCo           | 16.96              | 0.85 <sup>c</sup> | 7.82                | 0.15  | 6.72              | 0.07  | 5.65                   | 0.10 <sup>b</sup> | 3.18           | 0.14 | 59.66                            | 0.88 <sup>a</sup> |
| Jumbo           | 19.62              | 0.22 <sup>b</sup> | 7.61                | 0.11  | 6.64              | 0.51  | 7.33                   | 0.23 <sup>a</sup> | 3.19           | 0.05 | 55.60                            | 0.17 <sup>b</sup> |
