# Supplementary material for: Proteometabolomic Analysis Reveals Molecular Features Associated with Grain Size and Antioxidant Properties amongst Chickpea (Cicer arietinum L.) Seeds Genotypes
Source: MDPI journal article supplement (doi:10.3390/antiox11101850), 2022-09-20
Supplement: s1 [file s1]

Table S5: Endogenous content of phenolic compounds in chickpea grains.

| Phenolic compounds         | Samples      |              |              |              |              |
|----------------------------|--------------|--------------|--------------|--------------|--------------|
|                            | SmallF1      | BigF2        | SmallCo      | BigCo        | Jumbo        |
| <b>Precursor</b>           |              |              |              |              |              |
| L-Phenylalanine            | 25.33 + 0.83 | 14.62 + 0.17 | 19.88 + 0.13 | 11.09 + 0.13 | 16.62 + 0.13 |
| <b>Phenolic acids</b>      |              |              |              |              |              |
| 4-Hydroxyphenylacetic acid | 41.42 + 0.84 | 52.95 + 0.85 | 4.96 + 0.15  | 39.65 + 0.33 | 52.94 + 0.63 |
| 4-Hydroxybenzoic acid      | 14.26 + 0.13 | 6.53 + 0.22  | 6.35 + 0.57  | 2.50 + 0.07  | 4.60 + 0.05  |
| Gentisic acid              | 9.74 + 0.06  | 7.85 + 0.50  | 14.23 + 1.80 | 4.03 + 0.08  | 5.39 + 0.06  |
| Protocatechuic acid        | 0.44 + 0.04* | 0.28 + 0.02* | 0.22 + 0.01* | 0.21 + 0.00* | 0.30 + 0.02* |
| Vanillic acid              | 0.36 + 0.02* | 0.09 + 0.01* | 0.07 + 0.00* | 0.01 + 0.00* | 0.06 + 0.01* |
| Sinapic acid               | 0.33 + 0.01* | 0.27 + 0.01* | 0.33 + 0.01* | 0.15 + 0.02* | 0.18 + 0.01* |
| Salicylic acid             | 0.30 + 0.00* | 0.06 + 0.01* | 0.16 + 0.01* | ---          | ---          |
| 4-Coumaric acid            | 0.20 + 0.02* | 0.03 + 0.01* | 0.07 + 0.01* | ---          | 0.03 + 0.01* |
| Ferulic acid               | 0.14 + 0.02* | ---          | ---          | ---          | ---          |
| <b>Phenolic aldehyde</b>   |              |              |              |              |              |
| Vanillin                   | 0.17 + 0.00* | 0.12 + 0.01* | 0.05 + 0.04* | 0.05 + 0.01* | ---          |
| <b>Flavonoid</b>           |              |              |              |              |              |
| Kaempferol-3-O-glucoside   | 0.96 + 0.02* | 0.39 + 0.01* | 0.42 + 0.01* | 0.38 + 0.03* | 0.19 + 0.01* |
| <b>Lignan</b>              |              |              |              |              |              |
| Secoisolariciresinol       | 1.18 + 0.08* | 1.90 + 0.13* | 1.54 + 0.18* | 1.00 + 0.04* | ---          |

Concentration is expressed in µg/g of dried methanolic extract. It is shown the average and standard deviation of three determinations. Value determined below the limit of quantification (\*). Phenolic compound not identified (---).
