# Supplementary material for: Proteometabolomic Analysis Reveals Molecular Features Associated with Grain Size and Antioxidant Properties amongst Chickpea (Cicer arietinum L.) Seeds Genotypes
Source: MDPI journal article supplement (doi:10.3390/antiox11101850), 2022-09-20
Supplement: s1 [file s1]

**Table S4.** Putative identification of core compounds detected in chickpea grains

| RT                                   | m/z      | Compound                         | Adduct                               | Adduct m/z | Error | Chemical group                 |
|--------------------------------------|----------|----------------------------------|--------------------------------------|------------|-------|--------------------------------|
| <b>Carbohydrates</b>                 |          |                                  |                                      |            |       |                                |
| 0.43                                 | 391.1015 | Galactopinitol                   | [M+Cl] <sup>-</sup>                  | 391.1013   | 0.5   | Hexose derivative              |
| 0.46                                 | 563.1846 | Xylopyranosyl-arabinose          | [M-H] <sup>-</sup>                   | 563.1829   | 3.0   | Oligosaccharide                |
| 0.49                                 | 503.1636 | Oligosaccharide                  | [M-H] <sup>-</sup>                   | 503.1618   | 3.6   | Oligosaccharide                |
| 1.84                                 | 863.4269 | Amylopectin                      | [M+Cl] <sup>-</sup>                  | 863.2441   | 3.2   | Polysaccharide                 |
| <b>Organic acids</b>                 |          |                                  |                                      |            |       |                                |
| 0.71                                 | 191.0196 | Citric acid                      | [M-H] <sup>-</sup>                   | 191.0197   | -0.5  | Organic acid                   |
| <b>Nitrogen Containing Compounds</b> |          |                                  |                                      |            |       |                                |
| 1.70                                 | 309.1088 | Glutamyltyrosine                 | [M-H] <sup>-</sup>                   | 309.1092   | -1.3  | Amino acid derivative          |
| 2.28                                 | 203.0822 | Tryptophan                       | [M-H] <sup>-</sup>                   | 203.0826   | -2.0  | Amino acid                     |
| 2.81                                 | 293.1154 | Glutamylphenylalanine            | [M-H] <sup>-</sup>                   | 293.1143   | 3.8   | Amino acid derivative          |
| <b>Phenolics</b>                     |          |                                  |                                      |            |       |                                |
| 0.48                                 | 381.0972 | Genistein-rhamnoside             | [M-2H <sub>2</sub> O+H] <sup>+</sup> | 381.0980   | -2.1  | Isoflavonoid glucoside         |
| 0.49                                 | 711.2227 | Trihydroxy-heptamethoxy-biflavan | [M+Cl] <sup>-</sup>                  | 711.2214   | 1.8   | Biflavonoid                    |
| 1.72                                 | 315.0721 | Protocatechuic acid glucoside    | [M-H] <sup>-</sup>                   | 315.0722   | -0.3  | Dihydrobenzoic acid glucoside  |
| 2.27                                 | 188.0750 | Pentamethoxyflavanone            | [M+2H] <sup>2+</sup>                 | 188.0756   | -3.2  | Polymethoxyflavone             |
| <b>Terpenoids</b>                    |          |                                  |                                      |            |       |                                |
| 1.72                                 | 311.1304 | Gibberellin                      | [M-2H <sub>2</sub> O+H] <sup>+</sup> | 311.1289   | 4.8   | Diterpenoid                    |
| 2.80                                 | 295.1340 | Gibberellin A5                   | [M-2H <sub>2</sub> O+H] <sup>+</sup> | 295.1340   | 0.0   | Diterpenoid                    |
| 3.47                                 | 281.1389 | Dihydrophaseic acid              | [M-H] <sup>-</sup>                   | 281.1394   | -1.8  | Sesquiterpenoid                |
| 9.85                                 | 941.5111 | Soyasaponin I                    | [M-H] <sup>-</sup>                   | 941.5115   | -0.4  | Triterpenoid saponin           |
| 10.09                                | 795.4521 | Soyasaponin III                  | [M-H] <sup>-</sup>                   | 795.4536   | -1.9  | Triterpenoid saponin           |
| <b>Lipids</b>                        |          |                                  |                                      |            |       |                                |
| 12.93                                | 478.2926 | Lysophospholipid                 | [M+H] <sup>+</sup>                   | 478.2928   | -0.4  | Lysophospholipid               |
| 13.00                                | 520.3401 | Lysolecithin                     | [M+H] <sup>+</sup>                   | 520.3398   | 0.6   | Phosphatidylcholine derivative |
| 13.26                                | 478.2927 | Lysophospholipid                 | [M+H] <sup>+</sup>                   | 478.2928   | -0.2  | Lysophospholipid               |
| 13.32                                | 520.3400 | Lysolecithin                     | [M+H] <sup>+</sup>                   | 520.3398   | 0.4   | Phosphatidylcholine derivative |
| 13.38                                | 313.2743 | Glycerolipid                     | [M-H <sub>2</sub> O+H] <sup>+</sup>  | 313.2743   | 0.0   | Glycerolipid                   |
| 13.60                                | 496.3402 | Lysolecithin                     | [M+H] <sup>+</sup>                   | 496.3398   | 0.8   | Phosphatidylcholine derivative |
| 13.92                                | 454.2928 | Lysophospholipid                 | [M+H] <sup>+</sup>                   | 454.2928   | 0.0   | Lysophospholipid               |
| 13.99                                | 496.3402 | Lysolecithin                     | [M+H] <sup>+</sup>                   | 496.3398   | 0.8   | Phosphatidylcholine derivative |
| 14.09                                | 522.3556 | Lysolecithin                     | [M+H] <sup>+</sup>                   | 522.3554   | 0.4   | Phosphatidylcholine derivative |
| 14.38                                | 480.3084 | Lysophospholipid                 | [M+H] <sup>+</sup>                   | 480.3085   | -0.2  | Lysophospholipid               |
| 14.45                                | 522.3562 | Lysolecithin                     | [M+H] <sup>+</sup>                   | 522.3554   | 1.5   | Phosphatidylcholine derivative |

RT: Retention time in minutes; m/z in Daltons; Error in ppm.
