# Supplementary material for: Proteometabolomic Analysis Reveals Molecular Features Associated with Grain Size and Antioxidant Properties amongst Chickpea (Cicer arietinum L.) Seeds Genotypes
Source: MDPI journal article supplement (doi:10.3390/antiox11101850), 2022-09-20
Supplement: s1 [file s1]

**Table S3.** Key differential proteins identified in proteomic comparative analysis-based TMT- SPS-MS<sup>3</sup>. Data associated with figure 3D.

| Checkpea   | Arabidopsis homologs | Protein names                                                                                                                                        | Log2 BigCo/SmallCo | Log2 BigCo/BigF2 | Log2 BigCo/SmallF1 | Log2 BigCo/Jumbo |
|------------|----------------------|------------------------------------------------------------------------------------------------------------------------------------------------------|--------------------|------------------|--------------------|------------------|
| A0A1S2XH76 | Q9SGH6               | Alpha-dioxygenase 1 (Alpha DOX1) (EC 1.14.99.-) (                                                                                                    | 0.50496595         | -0.1965366       | 0.27386754         | -0.0241967       |
| A0A1S2Y5V8 | Q9C826               | Xanthoxin dehydrogenase (EC 1.1.1.288)                                                                                                               | 0.05212273         | -0.3013044       | -0.1501403         | 0.01402956       |
| A0A1S2YI47 | Q39026               | Mitogen-activated protein kinase 6 (AtMPK6) (MAP kinase 6) (EC 2.7.11.24)                                                                            | 0.5322928          | 0.17250951       | 0.39715673         | -0.1068914       |
| A5X7B9     | Q39023               | Mitogen-activated protein kinase 3 (AtMPK3) (MAP kinase 3) (EC 2.7.11.24)                                                                            | 0.48347024         | -0.0010873       | 0.32701313         | 0.04754745       |
| A0A1S3E9R6 | F4JZY1               | COPI-interactive protein 1                                                                                                                           | -0.2991496         | 0.01452611       | 0.10489519         | 0.04267062       |
| A0A1S2Y229 | Q940H6               | Serine/threonine-protein kinase SRK2E (EC 2.7.11.1)                                                                                                  | 0.41119543         | -0.1392512       | -0.0127673         | -0.1669296       |
| Q8L5Q6     | Q22850               | Probable glutathione peroxidase 3, mitochondrial (EC 1.11.1.9)                                                                                       | 0.12382392         | 0.1698014        | -0.2746883         | -0.0647751       |
| A0A1S2YQ46 | Q93VR4               | MLP-like protein 423                                                                                                                                 | -0.1120235         | 0.42553818       | -0.1892971         | -0.0188879       |
| A0A1S2XKS3 | Q9ZQ80               | Nodulin-related protein 1 (AtNRP1) (RPS2-interacting protein 11)                                                                                     | -1.0187994         | 0.2403321        | -0.7680418         | 0.1560192        |
| A0A1S2XED8 | Q38882               | Phospholipase D alpha 1 (AtPLDalpha1) (PLD alpha 1) (EC 3.1.4.4)                                                                                     | 0.48583482         | 0.01720427       | 0.21870476         | 0.06213339       |
| A0A1S2XQL9 | Q9C5Z2               | Eukaryotic translation initiation factor 3 subunit H (eIF3h) (Eukaryotic translation initiation factor 3 subunit 3) (eIF-3-gamma) (eIF3 p38 subunit) | 0.47845533         | -0.1762574       | 0.30323489         | -0.1254189       |
| A0A1S2XUA5 | Q8L4B2               | Nuclear transcription factor Y subunit C-9 (AtNF-YC-9) (Transcriptional activator HAP5C)                                                             | 0.1153198          | -0.1753026       | -0.4128318         | 0.0158296        |
| A0A1S2YGY7 | Q42546               | SAL1 phosphatase (3'(2'),5'-bisphosphate nucleotidase 1) (EC 3.1.3.7) (3'(2'),5'-bisphosphonucleoside 3'(2')-phosphohydrolase 1)                     | -0.0955443         | 0.02153316       | -0.1514831         | 0.03774836       |
| A0A1S2YIG9 | Q9SSL1               | Protein C2-DOMAIN ABA-RELATED 7                                                                                                                      | 0.16794464         | 0.0052943        | -0.3646237         | -0.0313642       |
| A0A1S2YDP0 | Q9XFK7               | Protein MOTHER of FT and TFL1                                                                                                                        | 0.38596651         | -0.192271        | -0.0327588         | -0.083736        |
| A0A1S3DYS5 | F4IVM7               | Non-specific serine/threonine protein kinase (EC 2.7.11.1)                                                                                           | 0.55834421         | -0.0445006       | 0.04955042         | 0.2350857        |
| A0A1S2YLS1 | Q02973               | Em-like protein GEA6                                                                                                                                 | -1.5704823         | 0.12670394       | -0.492603          | 0.09983954       |
| A0A1S2YHK8 | Q9FNK4               | Ornithine aminotransferase, mitochondrial (EC 2.6.1.13)                                                                                              | 0.64582208         | -0.0731045       | 0.36430292         | -0.2967347       |

|            |        |                                                                                                                                          |            |            |            |            |
|------------|--------|------------------------------------------------------------------------------------------------------------------------------------------|------------|------------|------------|------------|
| A0A1S2Z041 | Q9M060 | Eukaryotic translation initiation factor 6-2 (AteIF-6;2)                                                                                 | -0.2030919 | -0.2824743 | -0.4782193 | -0.4758088 |
| A0A1S2Z701 | Q9SYT0 | Annexin D1 (AnnA1) (Annexin A1)                                                                                                          | 0.43691362 | -0.1622683 | 0.18683525 | -0.0733399 |
| A0A1S2XE65 | Q9LVC5 | Glucose-6-phosphate 1-epimerase (EC 5.1.3.15)                                                                                            | 0.7249457  | 0.08033371 | 0.36447715 | -0.2106376 |
| A0A1S2Z6F7 | Q9FND9 | Probable galactinol--sucrose galactosyltransferase 5 (EC 2.4.1.82)                                                                       | -0.2347321 | -0.0955263 | -0.1416227 | -0.2072514 |
| A0A1S2YBQ7 | Q70DU8 | Aldehyde dehydrogenase family 3 member H1 (AtALDH4) (Ath-ALDH4) (EC 1.2.1.3)                                                             | 0.64664244 | 0.01316267 | 0.60897304 | 0.01430742 |
| A0A1S2XGM0 | Q9SYG7 | Aldehyde dehydrogenase family 7 member B4 (EC 1.2.1.3) (Antiquitin-1)                                                                    | 0.50930374 | -0.2939561 | 0.21884598 | 0.00806681 |
| A0A1S2XPP7 | O04499 | 2,3-bisphosphoglycerate-independent phosphoglycerate mutase 1 (BPG-independent PGAM 1) (Phosphoglyceromutase 1) (EC 5.4.2.12) (PGAM-I 1) | 0.39766737 | -0.0464101 | 0.18187894 | -0.0326432 |
| A0A067XTI7 | Q9SYK9 | UDP-glycosyltransferase 74E2 (EC 2.4.1.-)                                                                                                | 0.65057656 | -0.0077209 | 0.4181744  | -0.0441092 |
| A0A1S2XXH2 | Q9LJ97 | Late embryogenesis abundant protein 31 (LEA 31) (Protein RESPONSIVE TO ABSCISIC ACID 28) (AtRAB28)                                       | -1.1104694 | 0.25400083 | -0.5115929 | 0.06278248 |
| A0A1S2YEL8 | O24456 | Receptor for activated C kinase 1A                                                                                                       | 0.14733705 | -0.1372275 | 0.10055817 | 0.07932811 |
| A0A3Q7XNW1 | P15455 | 12S seed storage protein CRA1 (Cruciferin 1) (AtCRU1)                                                                                    | 0.39541937 | 0.53460938 | 0.65319235 | -0.0333242 |
| A0A1S2XSB9 | P15456 | 12S seed storage protein CRB (Cruciferin 2) (AtCRU2) (Cruciferin B)                                                                      | 0.05409741 | 0.64853737 | 0.46826556 | 0.30989227 |
| A0A1S2YSV6 | P55034 | 26S proteasome non-ATPase regulatory subunit 4 homolog (26S proteasome regulatory subunit RPN10)                                         | -0.1294573 | 0.00325757 | -0.1679804 | 0.17997582 |
| A0A1S2YBZ6 | P06525 | Alcohol dehydrogenase class-P (AtADH) (EC 1.1.1.1)                                                                                       | 0.66751838 | -0.0989213 | 0.15628652 | -0.2346181 |
| A0A1S2Z5Q8 | O22809 | NAD(P)-binding Rossmann-fold superfamily protein (Putative cinnamoyl-CoA reductase)                                                      | 0.64319805 | -0.5407374 | 0.02006562 | -0.5428883 |
| A0A1S2XHG2 | O65282 | 20 kDa chaperonin, chloroplastic                                                                                                         | 0.18242918 | 0.29345062 | -0.2196559 | 0.41489253 |
| A0A1S2XT87 | Q9LZR5 | Histone deacetylase HDT3 (HD-tuins protein 3) (Histone deacetylase 2c)                                                                   | -0.1146665 | 0.15945308 | -0.3084035 | 0.0601576  |
| A0A1S2XFZ1 | Q9SIB9 | Aconitate hydratase 3, mitochondrial (Aconitase 3) (mACO1) (EC 4.2.1.3)                                                                  | 0.37750017 | -0.4632011 | -0.0787552 | -0.2222678 |
| A0A1S2Z6X7 | Q9LQ55 | Dynamin-2B (EC 3.6.5.5) (Dynamin-like protein 3) (Dynamin-related protein 2B)                                                            | 0.4288961  | -0.1158241 | 0.28743817 | -0.100542  |
| A0A1S2Y7V6 | P42759 | Dehydrin ERD10 (Low-temperature-induced protein LTI45)                                                                                   | -1.2703345 | 0.99241522 | -0.1204316 | 0.0034385  |

|            |            |                                                                                       |            |            |            |            |
|------------|------------|---------------------------------------------------------------------------------------|------------|------------|------------|------------|
| A0A1S2XBN2 | Q06327     | Linoleate 9S-lipoxygenase 1 (EC 1.13.11.58) (Lipoxygenase 1) (AtLOX1)                 | 0.65015708 | -0.1748523 | 0.29287441 | -0.0137869 |
| A0A1S2XP37 | F4KCC2     | E3 ubiquitin-protein ligase PRT6 (EC 2.3.2.27)                                        | 0.33687446 | 0.07351907 | -0.1422096 | 0.27467158 |
| A0A1S2YJU0 | F4ISU2     | Early endosome antigen                                                                | -0.8573443 | 0.30282356 | -0.2634173 | 0.26646025 |
| A0A1S2YB75 | Q9ZVY7     | Oil body-associated protein 1A                                                        | 0.13637274 | -0.9052055 | 0.29174459 | -1.3620341 |
| A0A1S2YNM8 | Q944G9     | Fructose-bisphosphate aldolase 2, chloroplastic (AtFBA2) (EC 4.1.2.13)                | 0.32220902 | -0.3165247 | -0.0134205 | -0.042077  |
| A0A1S2YHC3 | F4INZ9     | 2-oxoglutarate (2OG) and Fe(II)-dependent oxygenase superfamily protein               | 0.55629509 | -0.0549014 | 0.34812579 | -0.1447743 |
| A0A1S2Y255 | F4J9A0     | Nodulin/glutamine synthase-like protein                                               | 0.71158221 | -0.0899257 | 0.21013946 | 0.32792684 |
| A0A1S2Z4J7 | P25696     | Bifunctional enolase 2/transcriptional activator (EC 4.2.1.11) (                      | 0.73433788 | -0.1345641 | 0.37012791 | -0.0508726 |
| A0A1S2YRG3 | Q9S7V4     | HVA22-like protein a (AtHVA22a)                                                       | -0.3407742 | -0.2926799 | -0.1104765 | -0.4939593 |
| A0A1S2YH16 | Q9FKB0     | Sm-like protein LSM5 (AtLSM5)                                                         | -0.2162637 | 0.17356844 | -0.0300793 | -0.0275615 |
| A0A3Q7XSJ1 | Q8LDQ4     | PP2A regulatory subunit TAP46 (2A phosphatase-associated protein of 46 kDa)           | -0.1101781 | -0.0634533 | 0.01107016 | -0.1369727 |
| A0A1S2XAC0 | O81439     | Probable plastid-lipid-associated protein 1, chloroplastic (AtPap1)                   | 0.07774395 | 0.16172706 | 0.06160293 | -0.1851125 |
| B5LMK8     | O03042     | Ribulose biphosphate carboxylase large chain (RuBisCO large subunit) (EC 4.1.1.39)    | 0.11748336 | -0.2320174 | -0.1232102 | -0.0686661 |
| A0A1S2YL17 | Q93ZG7     | DEAD-box ATP-dependent RNA helicase 38 (EC 3.6.4.13)                                  | 0.27212411 | -0.1178702 | -0.0368855 | -0.2187376 |
| A0A1S2XYS8 | Q9LIL3     | Aluminum induced protein with YGL and LRDR motifs (Uncharacterized protein At3g22850) | -0.2931389 | -0.1685353 | -0.2649778 | -0.0301045 |
| A0A1S3DW19 | A0A1P8B3K6 | CAP160 protein                                                                        | -1.1458625 | -0.0435648 | -0.8169424 | -0.1565535 |
| A0A1S3E3Z2 | F4KG52     | CAP160 protein                                                                        | -1.3552196 | 0.25456099 | -0.4416017 | 0.06225122 |
