# Supplementary material for: Proteometabolomic Analysis Reveals Molecular Features Associated with Grain Size and Antioxidant Properties amongst Chickpea (Cicer arietinum L.) Seeds Genotypes
Source: MDPI journal article supplement (doi:10.3390/antiox11101850), 2022-09-20
Supplement: s1 [file s1]

**Table S6.** Conditions for each compound used in MRM (Multiple Reaction Monitoring)

| Compound                           | dMRM Transition |             |       | Mass Spectrometric Conditions |            |          | Quantification Conditions |                 |                |
|------------------------------------|-----------------|-------------|-------|-------------------------------|------------|----------|---------------------------|-----------------|----------------|
|                                    | Precursor Ion   | Product Ion | RT    | Collision Energy              | Fragmentor | Polarity | Quantification Range (μM) | Regression Type | R <sup>2</sup> |
| Shikimic acid                      | 173.1           | 111.1       | 0.49  | 10                            | 100        | Negative | 0.5–19                    | Quadratic       | 0.99           |
| Gallic acid                        | 169.0           | 125.2       | 1.4   | 10                            | 100        | Negative | 1–19                      | Quadratic       | 0.99           |
| L-Phenylalanine                    | 166.1           | 131.0       | 1.92  | 10                            | 100        | Positive | 0.25–19                   | Quadratic       | 0.99           |
| Protocatechuic acid                | 153.0           | 109.1       | 2.5   | 10                            | 100        | Negative | 0.25–19                   | Quadratic       | 0.99           |
| 4-Hydroxybenzoic acid              | 137.1           | 92.8        | 3.76  | 10                            | 100        | Negative | 0.25–19                   | Quadratic       | 0.99           |
| Gentisic acid                      | 153.0           | 109.0       | 3.83  | 10                            | 100        | Negative | 0.25–19                   | Quadratic       | 0.99           |
| 4-Hydroxyphenylacetic acid         | 107.1           | 77.0        | 4.72  | 20                            | 140        | Positive | 0.25–19                   | Quadratic       | 0.99           |
| (-)-Epigallocatechin               | 305.1           | 125.0       | 4.83  | 20                            | 140        | Negative | 1–17                      | Quadratic       | 0.99           |
| (+)-Catechin                       | 291.0           | 138.9       | 5.07  | 10                            | 100        | Positive | 0.5–19                    | Quadratic       | 0.99           |
| Vanillic acid                      | 169.0           | 93.0        | 5.12  | 10                            | 100        | Positive | 0.25–19                   | Quadratic       | 0.99           |
| Scopolin                           | 355.1           | 193.0       | 5.25  | 20                            | 100        | Positive | 0.25–19                   | Quadratic       | 0.99           |
| Chlorogenic acid                   | 355.1           | 163.0       | 5.34  | 10                            | 100        | Positive | 0.25–19                   | Quadratic       | 0.99           |
| Caffeic acid                       | 181.0           | 163.        | 5.38  | 10                            | 100        | Positive | 0.5–19                    | Quadratic       | 0.99           |
| Malvin                             | 655.1           | 331.1       | 5.82  | 40                            | 100        | Positive | 0.5–19                    | Quadratic       | 0.99           |
| Kuromanin                          | 449.0           | 286.9       | 6.34  | 30                            | 100        | Positive | 0.5–19                    | Quadratic       | 0.99           |
| Procyanidin B2                     | 577.1           | 425.1       | 6.4   | 10                            | 100        | Negative | 1–19                      | Quadratic       | 0.99           |
| Vanillin                           | 153.0           | 124.9       | 6.52  | 10                            | 100        | Positive | 0.25–19                   | Quadratic       | 0.99           |
| Keracyanin                         | 595.2           | 287.1       | 6.88  | 20                            | 100        | Positive | 0.5–19                    | Quadratic       | 0.99           |
| (-)-Epicatechin                    | 291.0           | 138.8       | 6.96  | 10                            | 100        | Positive | 0.5–19                    | Quadratic       | 0.99           |
| 4-Coumaric acid                    | 165.0           | 147.0       | 7.21  | 10                            | 100        | Positive | 0.25–19                   | Quadratic       | 0.99           |
| Mangiferin                         | 423.0           | 302.8       | 7.32  | 10                            | 100        | Positive | 0.5–19                    | Quadratic       | 0.99           |
| Umbelliferone                      | 163.0           | 107.0       | 7.64  | 30                            | 100        | Positive | 0.25–19                   | Quadratic       | 0.99           |
| (-)-Gallocatechin gallate          | 458.9           | 139.0       | 7.95  | 20                            | 80         | Positive | 1–19                      | Quadratic       | 0.99           |
| Scopoletin                         | 193.0           | 133.0       | 8.4   | 10                            | 100        | Positive | 0.25–19                   | Quadratic       | 0.99           |
| Ferulic acid                       | 195.1           | 145.0       | 8.6   | 20                            | 100        | Positive | 0.25–19                   | Quadratic       | 0.99           |
| Quercetin 3,4-di-O-glucoside       | 627.0           | 302.9       | 8.77  | 10                            | 100        | Positive | 0.5–19                    | Quadratic       | 0.99           |
| 3-Coumaric acid                    | 165.05          | 147.04      | 8.81  | 10                            | 100        | Positive | 0.5–19                    | Quadratic       | 0.99           |
| Salicylic acid                     | 137.0           | 93          | 9.15  | 10                            | 100        | Negative | 0.5–19                    | Quadratic       | 0.99           |
| Sinapic acid                       | 225.1           | 207.1       | 9.16  | 10                            | 100        | Positive | 0.25–19                   | Quadratic       | 0.99           |
| Epicatechin gallate                | 443.1           | 123.0       | 9.83  | 10                            | 100        | Positive | 1–19                      | Quadratic       | 0.99           |
| Ellagic acid                       | 300.5           | 145.0       | 9.98  | 30                            | 170        | Negative | 1–19                      | Quadratic       | 0.99           |
| Myricitrin                         | 465.0           | 318.9       | 10.03 | 10                            | 100        | Positive | 1–19                      | Quadratic       | 0.99           |
| Pelargonidin                       | 271.1           | 121         | 10.22 | 20                            | 10         | Positive | 1–19                      | Quadratic       | 0.97           |
| Quercetin 3-D-galactoside          | 465.0           | 302.9       | 10.26 | 10                            | 100        | Positive | 0.25–19                   | Quadratic       | 0.99           |
| Rutin                              | 611.0           | 302.9       | 10.35 | 10                            | 100        | Positive | 0.25–19                   | Quadratic       | 0.99           |
| <i>p</i> -Anisic acid              | 153.1           | 109.0       | 10.45 | 5                             | 120        | Positive | 0.25–19                   | Quadratic       | 0.99           |
| Quercetin 3-glucoside              | 465.0           | 303.0       | 10.57 | 10                            | 100        | Positive | 0.25–19                   | Quadratic       | 0.99           |
| Luteolin 7-O-glucoside             | 449.0           | 287.0       | 10.77 | 10                            | 100        | Positive | 0.5–19                    | Quadratic       | 0.99           |
| Malvidin                           | 331.1           | 287.1       | 11.14 | 20                            | 100        | Positive | 1–17                      | Quadratic       | 0.96           |
| 2,4-Dimethoxy-6-methylbenzoic acid | 197.0           | 179.0       | 11.41 | 5                             | 80         | Positive | 0.25–19                   | Quadratic       | 0.99           |
| Penta-O-galloyl-B-D-glucose        | 771.1           | 153.0       | 11.68 | 20                            | 100        | Positive | 0.5–19                    | Quadratic       | 0.99           |
| Kaempferol 3-O-glucoside           | 449.0           | 286.9       | 11.91 | 10                            | 100        | Positive | 0.25–19                   | Quadratic       | 0.99           |
| Quercitrin                         | 449.1           | 303.1       | 11.95 | 10                            | 100        | Positive | 0.5–19                    | Quadratic       | 0.99           |
| Naringin                           | 273.0           | 153.0       | 12.13 | 10                            | 120        | Positive | 0.25–19                   | Quadratic       | 0.99           |
| Myricetin                          | 317.0           | 179.0       | 12.29 | 10                            | 100        | Negative | 0.5–15                    | Quadratic       | 0.99           |
| Hesperidin                         | 609.1           | 301.1       | 12.68 | 20                            | 100        | Negative | 0.5–19                    | Quadratic       | 0.99           |
| <i>trans</i> -Resveratrol          | 229.1           | 135.0       | 12.69 | 10                            | 100        | Positive | 0.5–19                    | Quadratic       | 0.99           |
| Rosmarinic acid                    | 361.1           | 163.0       | 12.8  | 10                            | 100        | Positive | 0.5–19                    | Quadratic       | 0.99           |

|                             |       |       |       |    |     |          |         |           |      |
|-----------------------------|-------|-------|-------|----|-----|----------|---------|-----------|------|
| Secoisolariciresinol        | 363.2 | 137.1 | 13.02 | 20 | 100 | Positive | 0.5–19  | Quadratic | 0.99 |
| Phloridzin                  | 435.0 | 272.9 | 13.04 | 10 | 100 | Negative | 0.25–19 | Quadratic | 0.99 |
| <i>trans</i> -Cinnamic acid | 149.1 | 131.0 | 14.08 | 10 | 100 | Positive | 0.25–19 | Quadratic | 0.99 |
| Psoralen                    | 187.0 | 131.1 | 14.99 | 20 | 100 | Positive | 0.25–19 | Quadratic | 0.99 |
| Quercetin                   | 302.9 | 153.1 | 15.18 | 35 | 100 | Positive | 1–19    | Quadratic | 0.99 |
| Luteolin                    | 287.1 | 153.0 | 15.28 | 30 | 100 | Positive | 0.5–19  | Quadratic | 0.99 |
| Angelicin                   | 187.0 | 131.1 | 15.75 | 20 | 100 | Positive | 0.5–19  | Quadratic | 0.99 |
| Naringenin                  | 271.0 | 151   | 16.79 | 10 | 100 | Negative | 0.5–19  | Quadratic | 0.99 |
| Apigenin                    | 271.0 | 153.0 | 17.45 | 30 | 100 | Positive | 0.5–19  | Quadratic | 0.99 |
| Matairesinol                | 359.2 | 137.1 | 17.55 | 10 | 100 | Positive | 0.25–19 | Quadratic | 0.99 |
| Kaempferol                  | 287.1 | 153.0 | 17.81 | 30 | 100 | Positive | 0.25–19 | Quadratic | 0.99 |
| Hesperetin                  | 303.1 | 177.1 | 18.06 | 20 | 100 | Positive | 0.25–19 | Quadratic | 0.99 |
| Podophyllotoxin             | 415.1 | 397.1 | 19.01 | 10 | 100 | Positive | 0.25–19 | Quadratic | 0.99 |
| Methyl cinnamate            | 163.1 | 131.0 | 21.46 | 6  | 100 | Positive | 0.25–1  | Quadratic | 0.99 |
| Nordihydroguaiaretic acid   | 303.0 | 193.1 | 22.72 | 10 | 100 | Positive | 0.5–19  | Quadratic | 0.99 |
| Chrysin                     | 255.1 | 153.0 | 22.89 | 40 | 100 | Positive | 0.25–19 | Quadratic | 0.99 |
| Kaempferide                 | 301.0 | 258.2 | 24.38 | 20 | 100 | Positive | 0.5–19  | Quadratic | 0.99 |
| Emodin                      | 269.0 | 225.0 | 27.45 | 20 | 150 | Negative | 1–17    | Quadratic | 0.99 |
| Chrysophanol                | 255.1 | 153.0 | 31.34 | 40 | 100 | Positive | 0.25–19 | Quadratic | 0.99 |

RT: Retention time in minutes;  $m/z$  in Daltons; Collision energy and  
Fragmentor values are in Volts.
