# Supplementary material for: Proteometabolomic Analysis Reveals Molecular Features Associated with Grain Size and Antioxidant Properties amongst Chickpea (Cicer arietinum L.) Seeds Genotypes
Source: MDPI journal article supplement (doi:10.3390/antiox11101850), 2022-09-20
Supplement: s1 [file s1]

**Table S2.** Functional annotation analysis-based GO enrichment of biological proceeds and cluster analysis of proteins over-accumulated in big (A) and small grains (B).

|                                                                                                                        |                                       |                               |              |            |                |                                 |  |  |  |
|------------------------------------------------------------------------------------------------------------------------|---------------------------------------|-------------------------------|--------------|------------|----------------|---------------------------------|--|--|--|
| <b>Big grains (A)</b>                                                                                                  |                                       |                               |              |            |                |                                 |  |  |  |
| % WARNING - This is exported REVIGO data useful only for the specific purpose of constructing a TreeMap visualization. |                                       |                               |              |            |                |                                 |  |  |  |
| % Do not use this table as a general list of non-redundant GO categories                                               | as it sets an extremely permissive    |                               |              |            |                |                                 |  |  |  |
| % threshold to detect redundancies (c=0.10) and fill the 'representative' column                                       | while normally c>=0.4 is recommended. |                               |              |            |                |                                 |  |  |  |
| % To export a reduced-redundancy set of GO terms                                                                       | go to the Scatterplot & Table tab     | and export to CSV from there. |              |            |                |                                 |  |  |  |
| term_ID                                                                                                                | description                           | frequencyInDb                 | log10 pvalue | uniqueness | dispensability | representative                  |  |  |  |
| GO:0006099                                                                                                             | tricarboxylic acid cycle              | 0.47%                         | 4.1085       | 0.619      | 0              | tricarboxylic acid cycle        |  |  |  |
| GO:0009086                                                                                                             | methionine biosynthetic process       | 0.33%                         | 2.1718       | 0.534      | 0.4            | tricarboxylic acid cycle        |  |  |  |
| GO:0006103                                                                                                             | 2-oxoglutarate metabolic process      | 0.02%                         | 1.3878       | 0.66       | 0.319          | tricarboxylic acid cycle        |  |  |  |
| GO:0019252                                                                                                             | starch biosynthetic process           | 0.01%                         | 2.6288       | 0.708      | 0.125          | tricarboxylic acid cycle        |  |  |  |
| GO:0009809                                                                                                             | lignin biosynthetic process           | 0.00%                         | 1.7186       | 0.774      | 0.194          | tricarboxylic acid cycle        |  |  |  |
| GO:0055114                                                                                                             | oxidation-reduction process           | 15.06%                        | 1.0575       | 0.77       | 0.216          | tricarboxylic acid cycle        |  |  |  |
| GO:0006635                                                                                                             | fatty acid beta-oxidation             | 0.08%                         | 2.3202       | 0.597      | 0.354          | tricarboxylic acid cycle        |  |  |  |
| GO:0006886                                                                                                             | intracellular protein transport       | 1.20%                         | 2.9283       | 0.92       | 0              | intracellular protein transport |  |  |  |
| GO:0016192                                                                                                             | vesicle-mediated transport            | 1.09%                         | 1.2461       | 0.92       | 0.32           | intracellular protein transport |  |  |  |
| GO:0046686                                                                                                             | response to cadmium ion               | 0.03%                         | 12.0205      | 0.883      | 0              | response to cadmium ion         |  |  |  |
| GO:0009651                                                                                                             | response to salt stress               | 0.04%                         | 2.609        | 0.839      | 0.231          | response to cadmium ion         |  |  |  |
| GO:0009058                                                                                                             | biosynthetic process                  | 31.61%                        | 1.2613       | 0.93       | 0.021          | biosynthesis                    |  |  |  |
| GO:0006457                                                                                                             | protein folding                       | 0.90%                         | 1.4729       | 0.91       | 0.032          | protein folding                 |  |  |  |
| GO:0009226                                                                                                             | nucleotide-sugar biosynthetic process | 0.14%                         | 1.483        | 0.824      | 0.05           | nucleotide-sugar biosynthesis   |  |  |  |
| GO:0010311                                                                                                             | lateral root formation                | 0.00%                         | 1.2676       | 0.891      | 0.051          | lateral root formation          |  |  |  |
| GO:0005975                                                                                                             | carbohydrate metabolic process        | 5.26%                         | 3.3645       | 0.868      | 0.069          | carbohydrate metabolism         |  |  |  |
| GO:0009399                                                                                                             | nitrogen fixation                     | 0.07%                         | 1.3878       | 0.885      | 0.084          | nitrogen fixation               |  |  |  |

|                                                                                                                        |                                                          |                               |              |            |                |                                            |  |  |  |
|------------------------------------------------------------------------------------------------------------------------|----------------------------------------------------------|-------------------------------|--------------|------------|----------------|--------------------------------------------|--|--|--|
|                                                                                                                        |                                                          |                               |              |            |                |                                            |  |  |  |
| <b>Small grains (B)</b>                                                                                                |                                                          |                               |              |            |                |                                            |  |  |  |
| % WARNING - This is exported REVIGO data useful only for the specific purpose of constructing a TreeMap visualization. |                                                          |                               |              |            |                |                                            |  |  |  |
| % Do not use this table as a general list of non-redundant GO categories                                               | as it sets an extremely permissive                       |                               |              |            |                |                                            |  |  |  |
| % threshold to detect redundancies (c=0.10) and fill the 'representative' column                                       | while normally c>=0.4 is recommended.                    |                               |              |            |                |                                            |  |  |  |
| % To export a reduced-redundancy set of GO terms                                                                       | go to the Scatterplot & Table tab                        | and export to CSV from there. |              |            |                |                                            |  |  |  |
| term_ID                                                                                                                | description                                              | frequencyInDb                 | log10 pvalue | uniqueness | dispensability | representative                             |  |  |  |
| GO:0006457                                                                                                             | protein folding                                          | 0.90%                         | -<br>4.2848  | 0.9        | 0              | protein folding                            |  |  |  |
| GO:0009651                                                                                                             | response to salt stress                                  | 0.04%                         | -<br>4.5498  | 0.53       | 0              | response to salt stress                    |  |  |  |
| GO:0010039                                                                                                             | response to iron ion                                     | 0.01%                         | -<br>2.3055  | 0.565      | 0.371          | response to salt stress                    |  |  |  |
| GO:0009735                                                                                                             | response to cytokinin                                    | 0.01%                         | -<br>2.3396  | 0.604      | 0.22           | response to salt stress                    |  |  |  |
| GO:0009793                                                                                                             | embryo development ending in seed dormancy               | 0.02%                         | -<br>7.9431  | 0.85       | 0              | embryo development ending in seed dormancy |  |  |  |
| GO:0016444                                                                                                             | somatic cell DNA recombination                           | 0.01%                         | -<br>2.9189  | 0.855      | 0.024          | somatic cell DNA recombination             |  |  |  |
| GO:0009658                                                                                                             | chloroplast organization                                 | 0.02%                         | -<br>1.4237  | 0.852      | 0.025          | chloroplast organization                   |  |  |  |
| GO:0006801                                                                                                             | superoxide metabolic process                             | 0.14%                         | -1.93        | 0.84       | 0.038          | superoxide metabolism                      |  |  |  |
| GO:0045454                                                                                                             | cell redox homeostasis                                   | 0.86%                         | -<br>1.1955  | 0.867      | 0.062          | cell redox homeostasis                     |  |  |  |
| GO:0002181                                                                                                             | cytoplasmic translation                                  | 0.06%                         | -<br>2.4479  | 0.871      | 0.087          | cytoplasmic translation                    |  |  |  |
| GO:0006123                                                                                                             | mitochondrial electron transport, cytochrome c to oxygen | 0.01%                         | -<br>1.6315  | 0.81       | 0.166          | cytoplasmic translation                    |  |  |  |
